CORRECTION

# Correction: A Developmental Stage-Specific Switch from DAZL to BOLL Occurs during Fetal Oogenesis in Humans, but Not Mice

Jing He, Kayleigh Stewart, Hazel L. Kinnell, Richard A. Anderson, Andrew J. Childs

In the Funding section, the name of the first funder is incorrect. The correct name is: Medical Research Scotland. The correct funding information is: This work was supported by Medical Research Scotland [grant 354FRG to AJC] and the Medical Research Council [grant G1100357 to RAA]. J.H. is supported by a University of Edinburgh Darwin Scholarship and K.S. is the recipient of a Society for Reproduction and Fertility Summer Vacation Scholarship. The funders had no role in study design, data collection and analysis, decision to publish, or preparation of the manuscript.

## Reference

1. He J, Stewart K, Kinnell HL, Anderson RA, Childs AJ (2013) A Developmental Stage-Specific Switch from DAZL to BOLL Occurs during Fetal Oogenesis in Humans, but Not Mice. PLoS ONE 8(9): e73996. doi:[10.1371/journal.pone.0073996](https://doi.org/10.1371/journal.pone.0073996) PMID: [24086306](https://pubmed.ncbi.nlm.nih.gov/24086306/)

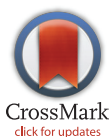

## OPEN ACCESS

**Citation:** He J, Stewart K, Kinnell HL, Anderson RA, Childs AJ (2015) Correction: A Developmental Stage-Specific Switch from DAZL to BOLL Occurs during Fetal Oogenesis in Humans, but Not Mice. PLoS ONE 10(8): e0136009. doi:[10.1371/journal.pone.0136009](https://doi.org/10.1371/journal.pone.0136009)

**Published:** August 13, 2015

**Copyright:** © 2015 He et al. This is an open access article distributed under the terms of the [Creative Commons Attribution License](https://creativecommons.org/licenses/by/4.0/), which permits unrestricted use, distribution, and reproduction in any medium, provided the original author and source are credited.
